# Supplementary material for: Identification and characterization of the zinc-regulated transporters, iron-regulated transporter-like protein (ZIP) gene family in maize
Source: PubMed Central journal article supplement (PMC3751942; doi:10.1186/1471-2229-13-114), 2013-08-08
Supplement: 1471-2229-13-114-S1.pdf [file 1471-2229-13-114-S1.pdf]

AtIRT1 1 -----MKTIFLVLI FV SFAIS PATSTAPEECG-----SESANPCVNKAKA  
 AtIRT2 1 -----MATTKLVI ILLILEFTFTV SPAISTAPEHCD-----SGFDNPCI NKAKA  
 OsIRT1 1 --MATPRTLVP IIPVVAALL LLLVAASSIPII AAQPADACGGAPDQAAADGACHDV PRA  
 OsIRT2 1 ----MMSSSQTPVRIAFVFLV ILAATDAHSDHRTPEPACG----GAAVGGECHSVARA  
 ZmIRT1 1 -MSWRRNQLRAFIVLAVILLIT AATYRANAQPAPPADETPAADTCADPSVEGACRNVEKA  
 AtIRT3 1 MFFVDVLWKLVP IYIFGSETKSI SATESII QIVPEAMAATSSNVLCNA SESDLCRDDSA

\*

AtIRT1 41 LPLKVI AIFVILIASMIGV GAPLFSRNVSFLQPDGNIF TIIKCFASG IILGTGFMHVL PD  
 AtIRT2 44 LPLKVI AIVAILTTSIIGVTSPLFSRYISFLRPDGNCFMIVKCFSSG IILGTGFMHVL PD  
 OsIRT1 59 LRLKLI AIP TILVSSVGVCLPLI SRSVPALRPDGCLEAVVKAFASGVILATGYMHVLPD  
 OsIRT2 52 LRLKLI AIPAILAASVAGVCLPLI SRSVPALRPDGCLEAVVKAFASGVILGTGYMHVLPD  
 ZmIRT1 60 LRLKLI AIP TILVSSVIGVCLPLI SRSVPALRPDRNLEFVIVKAFASGVILATGYMHVLPD  
 AtIRT3 61 FLKFEVAIASI ILAGAAGVTIPLIGRNRRLQTDGNL FVTAKAFAAGVILATGFVHM IAG

AtIRT1 101 SFEMLS SICLEENPW H KFPFSGLFAMISGLITL AIDSMATSLYTSK---NAVGI MP----  
 AtIRT2 104 SFEMLS SKCLSDN PWHKFPFAGFVAM SGLVTLAIDSI TTSLYTGK---NSVGPVPDE--  
 OsIRT1 119 AFNLTSPCLPRKPWSEFPFAAFVAMLA AVSTLMADSLM TTYNRSKPRESSGGDVA---  
 OsIRT2 112 SFNDLTS PCLPRKPWSEFPFAAFVAMLA AVFTLMVDSLMT FHTRG----SKGRASS---  
 ZmIRT1 120 SFNLTSPCLPRKPWADF SFTTFVAMLAALFTLMVDSLMSFYNRKGGNTSGRRTSG--  
 AtIRT3 121 GTEALKNPCLEDFPWSKFPFEGFAMIAALITL FVDFMGTQY YERKQEREASESVEPFGR

AtIRT1 154 -----  
 AtIRT2 159 -----EYCIDQEKA  
 OsIRT1 176 -----AVADHGESP  
 OsIRT2 165 -----AVAHHG--  
 ZmIRT1 178 -----AVADHESPA  
 AtIRT3 181 EQSPGIVVPMIGEGTNDGKVFGEEDSGGIHIVGIHAAHHRHSHPPGHDSCEGHSKIDI

AtIRT1 154 -HGHHGHGHPANDVTIPIKEDDSSN-----AQLLR YRVITAMVLELG IIVHVS  
 AtIRT2 168 IHMVGHNHSHGHGVV LTKDD-----COLLR YQVITAMVLEVG ILEHVS  
 OsIRT1 185 DQGRHRHGHHGHG HGMVAK-----PDDVEATQVQLRRNRV VQVLEIGIVVHVS  
 OsIRT2 171 DHGHCHAHALGQADVAALSTTEAADQSGDVEAGNTTKAQLLRNRV VQVLEMGIVVHVS  
 ZmIRT1 187 HEHWHSHGHGHG HGHAGGIVVADK-----PEDDEASQVQLRRNRV VQVLEMGIVVHVS  
 AtIRT3 241 GHAAHGHGHG HGHGHVHGGLDAVN-----GARHTVVSQVLELG IIVHSHSI

AtIRT1 200 VIGLSLGATSDTCTIKGLI AALCFHOMFEGMGLGGCIIQA EYTNMKKFM AFFFVAVTTPF  
 AtIRT2 211 VIGLSLGATNDSCTIKGLI IALCFHIFEG IGLGGCIIQADFTN VKKFLMAFFFTGTTTPC  
 OsIRT1 235 VIGLGMGASQNVCTIRPLVAAMCFHOMFEGMGLGGCIIQA EYGRMRSVI VFFFSTTTPF  
 OsIRT2 231 VIGLGMGASQNVCTIRPLVAALCFHOMFEGMGLGGCIIQA CYGGRTRSAI VFFFSTTTPF  
 ZmIRT1 242 VIGLGMGASQNVCTIRPLVITAMCFHOFEGMGLGGCIIQA EYGA KMKAGI VFFFSTTTPF  
 AtIRT3 286 IIGLSLGVSQSECTIRPLIAALS FHOIFEGFALGGCISQAQERNKSAITMACFFALTTPI

AtIRT1 260 GIALGLALSTVYQDNSPKALITVGLLNAC SAGLIT YMALVDLLAAEFMGPKLQGS IKMCF  
 AtIRT2 271 GIEGLGIALSSIYRDN SPTALITVGLLNAC SAGMLI YMALVDLLATEFMGSM LQGSIKLQI  
 OsIRT1 295 GIALGLALTRVYRDN SPTALIVVGLLNAA SAGLLHYMALVELLAADFMGPKLQGNVRLQL  
 OsIRT2 291 GIALGLALTRVYSDS SPTALVVVGLLNAA SAGLLHYMALVELLAADFMGPKLQGNVRLQL  
 ZmIRT1 302 GIALGLALTKVYRENSPTALIVVGLLNAA SAGLLHYMALVELLAADFMGPKLQSSVRLQL  
 AtIRT3 346 GIEGCTAVASSFNSHSVGALVTEG IITDSI SAGILYMALVDLLAADFSTKMR CNFRLQI

AtIRT1 320 KCLTAALLGCGGMSI IAKWA  
 AtIRT2 331 KCFTAALLGCAVMSVVAIWA  
 OsIRT1 355 AAFLAVLLGAGGMSVMAKWA  
 OsIRT2 351 AASLTAALLGAGGMSVMAKWA  
 ZmIRT1 362 LCFLAVLLGAGGMSI IAKWA  
 AtIRT3 406 VSYVMLFLGAGLMSI IAIWA
