# Supplementary material for: Identification and characterization of the zinc-regulated transporters, iron-regulated transporter-like protein (ZIP) gene family in maize
Source: PubMed Central journal article supplement (PMC3751942; doi:10.1186/1471-2229-13-114), 2013-08-08

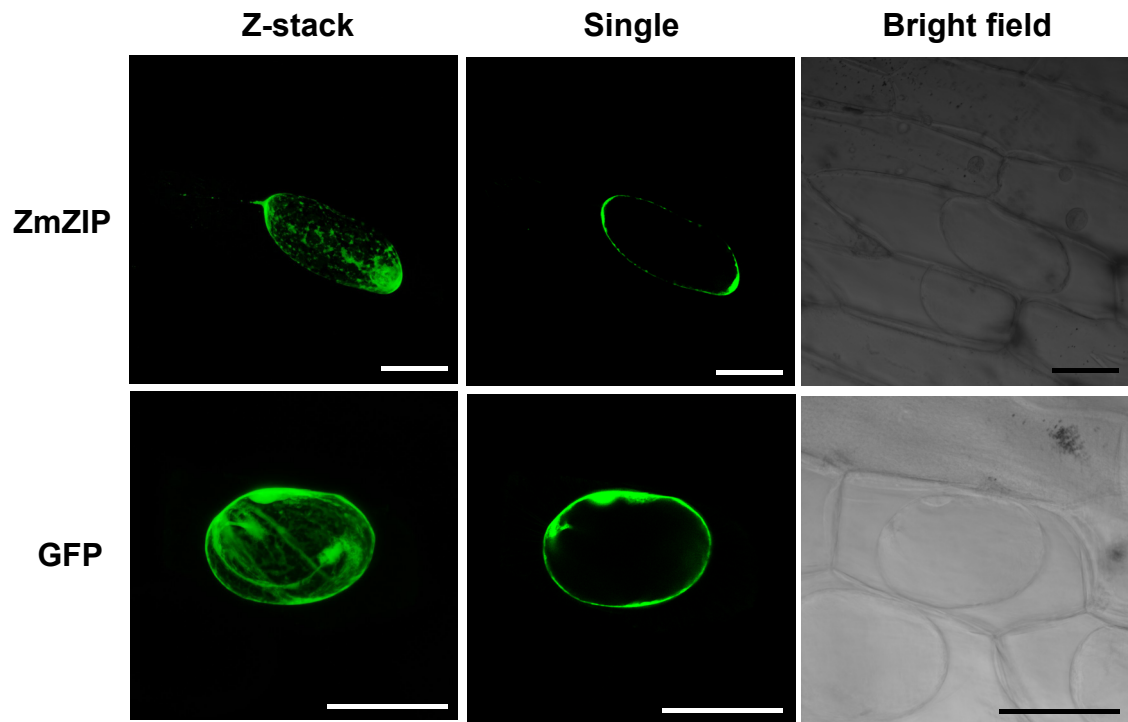

Supplement: 1471-2229-13-114-S5.pdf [file 1471-2229-13-114-S5.pdf]
